# Supplementary material for: Probabilistic ancestry maps: a method to assess and visualize population substructures in genetics
Source: PubMed Central journal article supplement (PMC6407257; doi:10.1186/s12859-019-2680-1), 2019-03-07

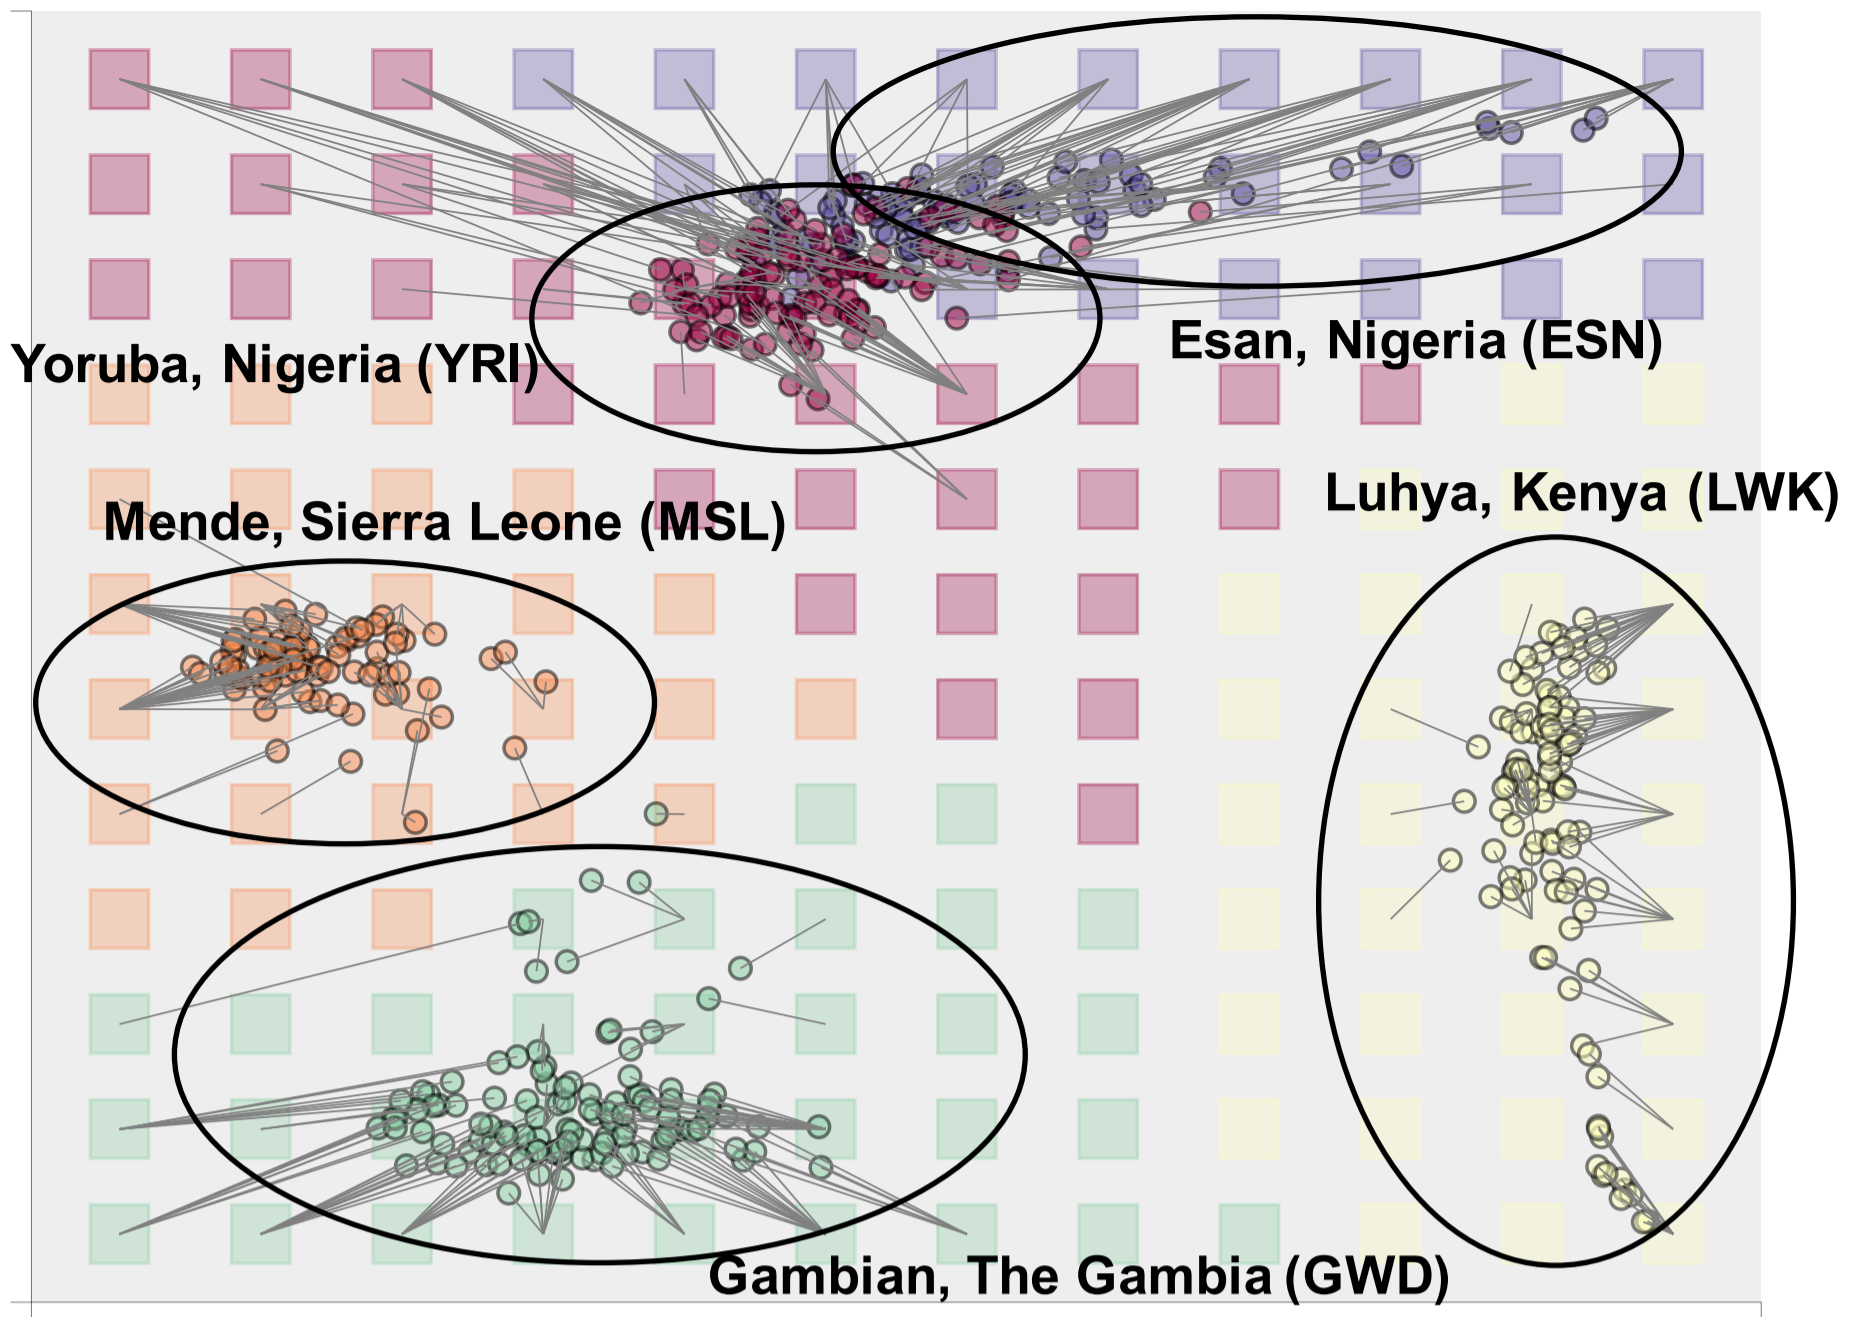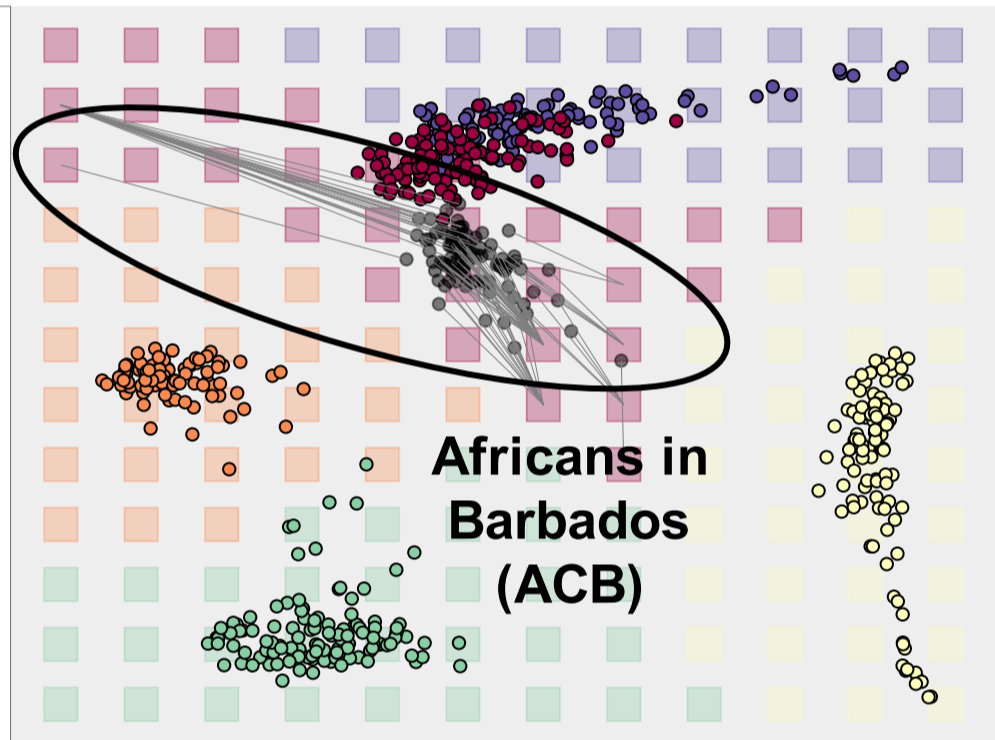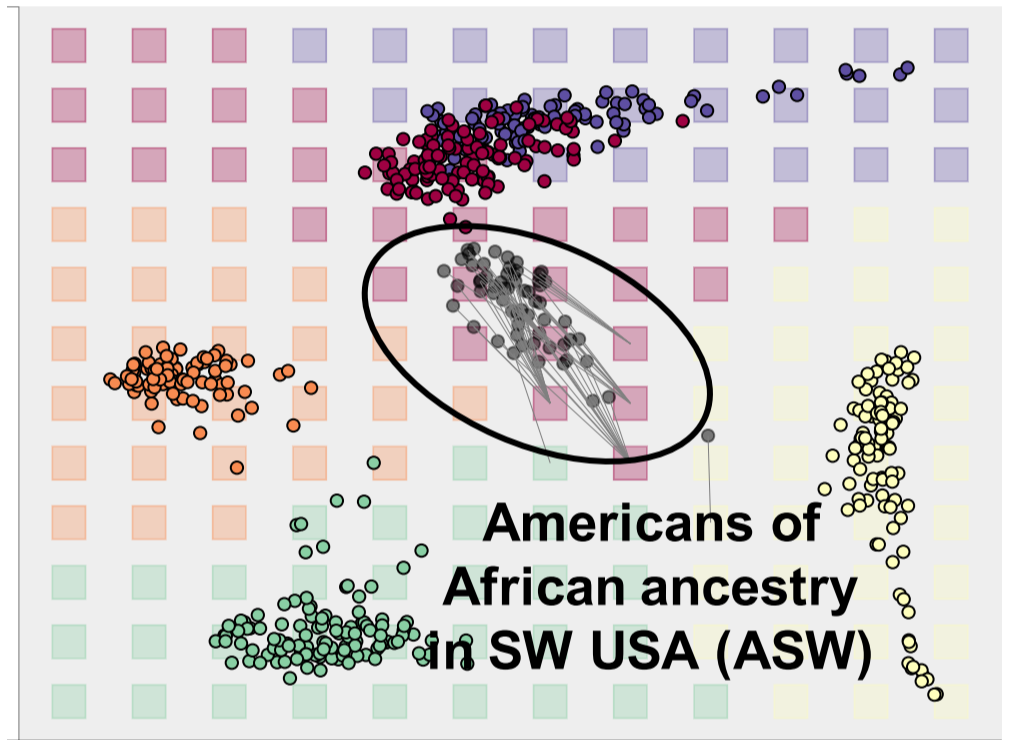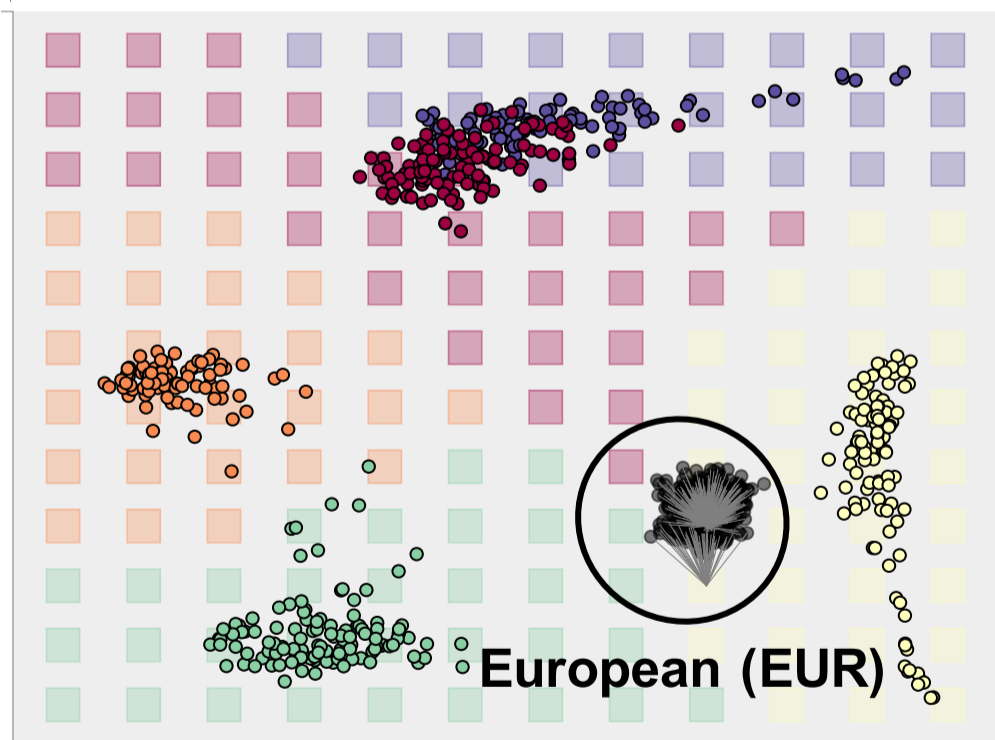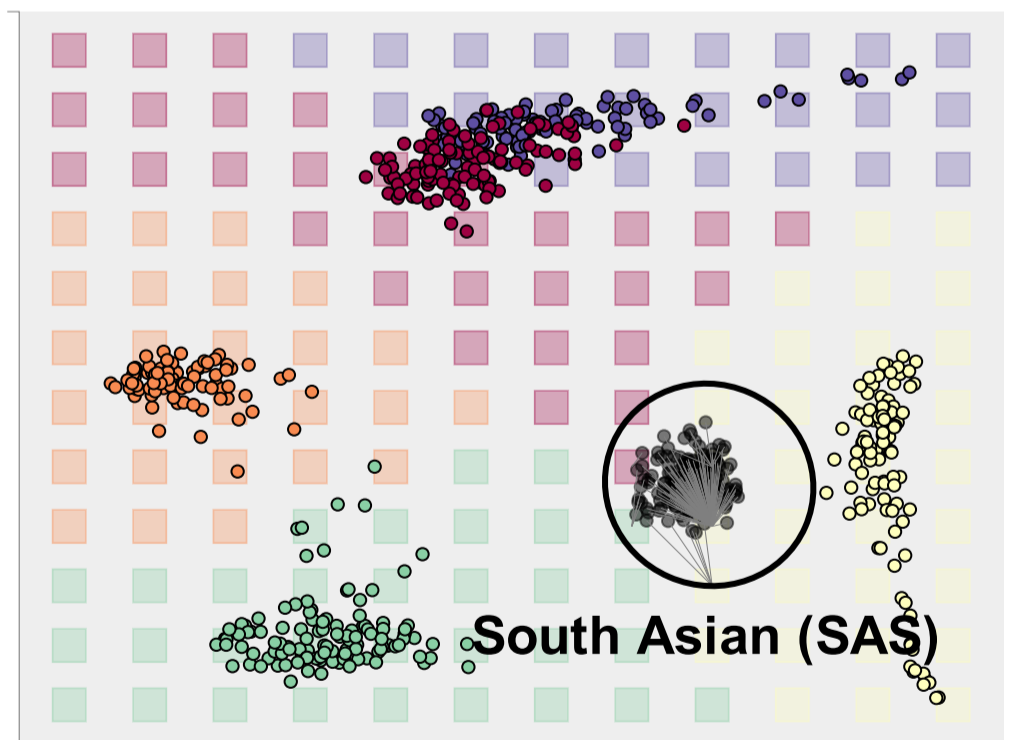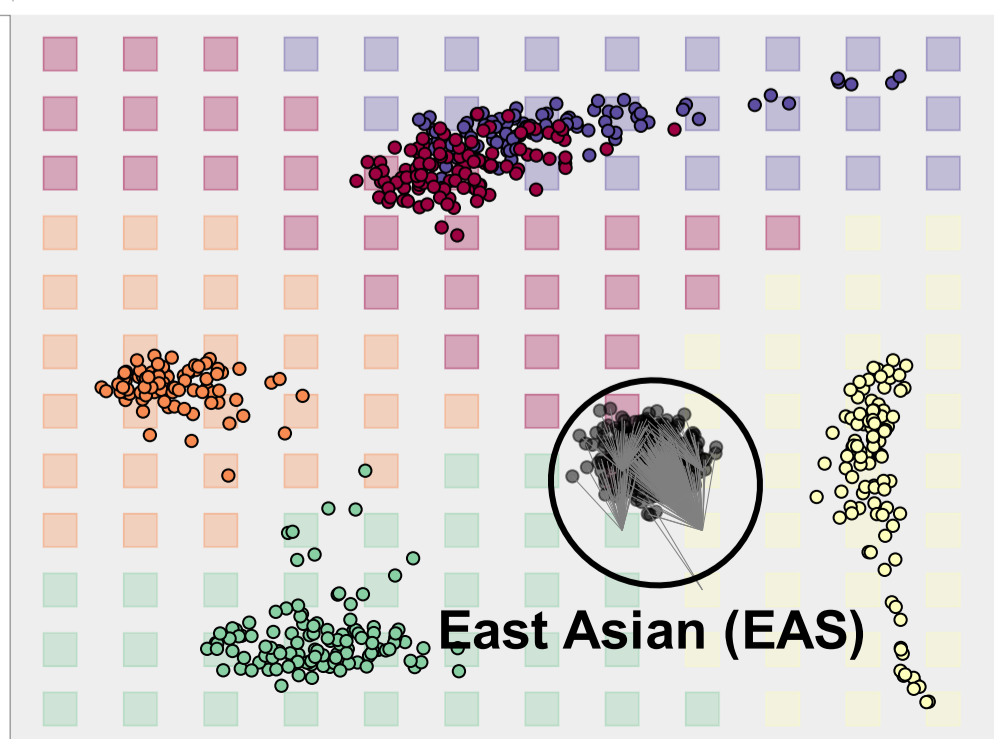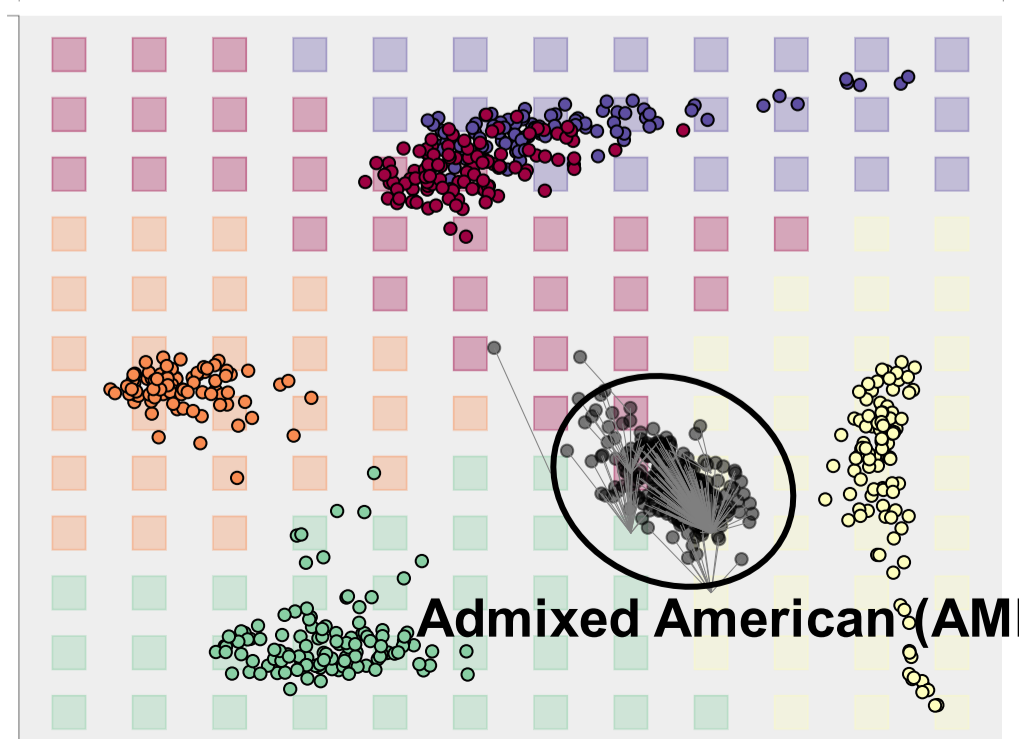

Supplement: 12859_2019_2680_MOESM15_ESM.pdf [file 12859_2019_2680_MOESM15_ESM.pdf]
